# Supplementary material for: Arabidopsis proteins with a transposon-related domain act in gene silencing
Source: PubMed Central journal article supplement (PMC5418596; doi:10.1038/ncomms15122), 2017-05-03
Supplement: ncomms15122-s1.pdf [file ncomms15122-s1.pdf]

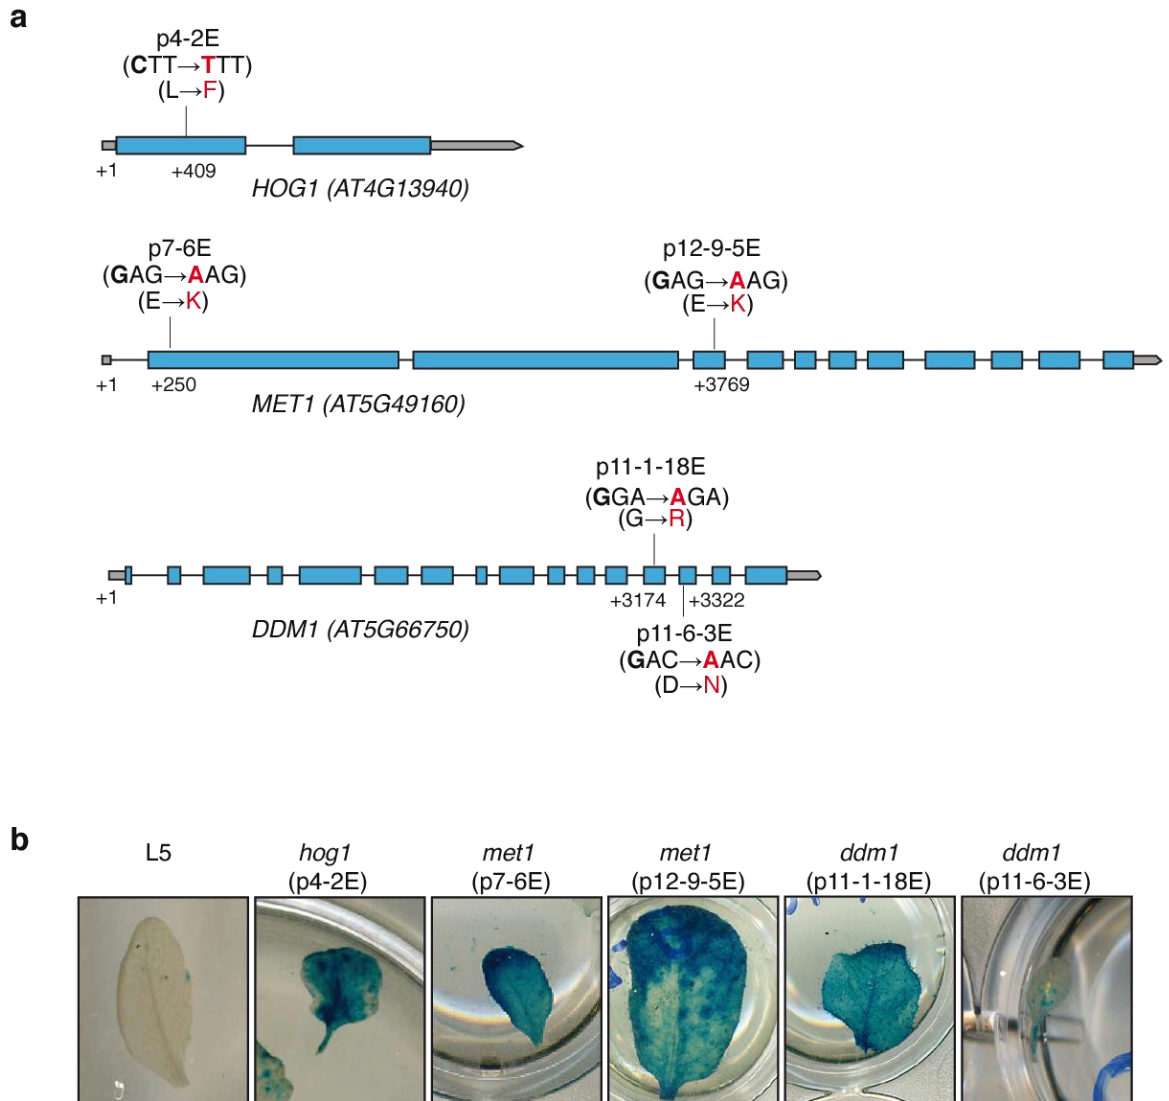

**Supplementary Figure 1.** New mutant alleles of known silencing regulators isolated in this study. **(a)** Representation of the genes and the recovered EMS-induced mutations. Nucleotide and corresponding amino acid changes are indicated in red. Position of the mutations within genes is indicated relative to the transcription start site (+1). **(b)** Representative images of histochemical staining for GUS activity in leaves from plants of the indicated genotypes.

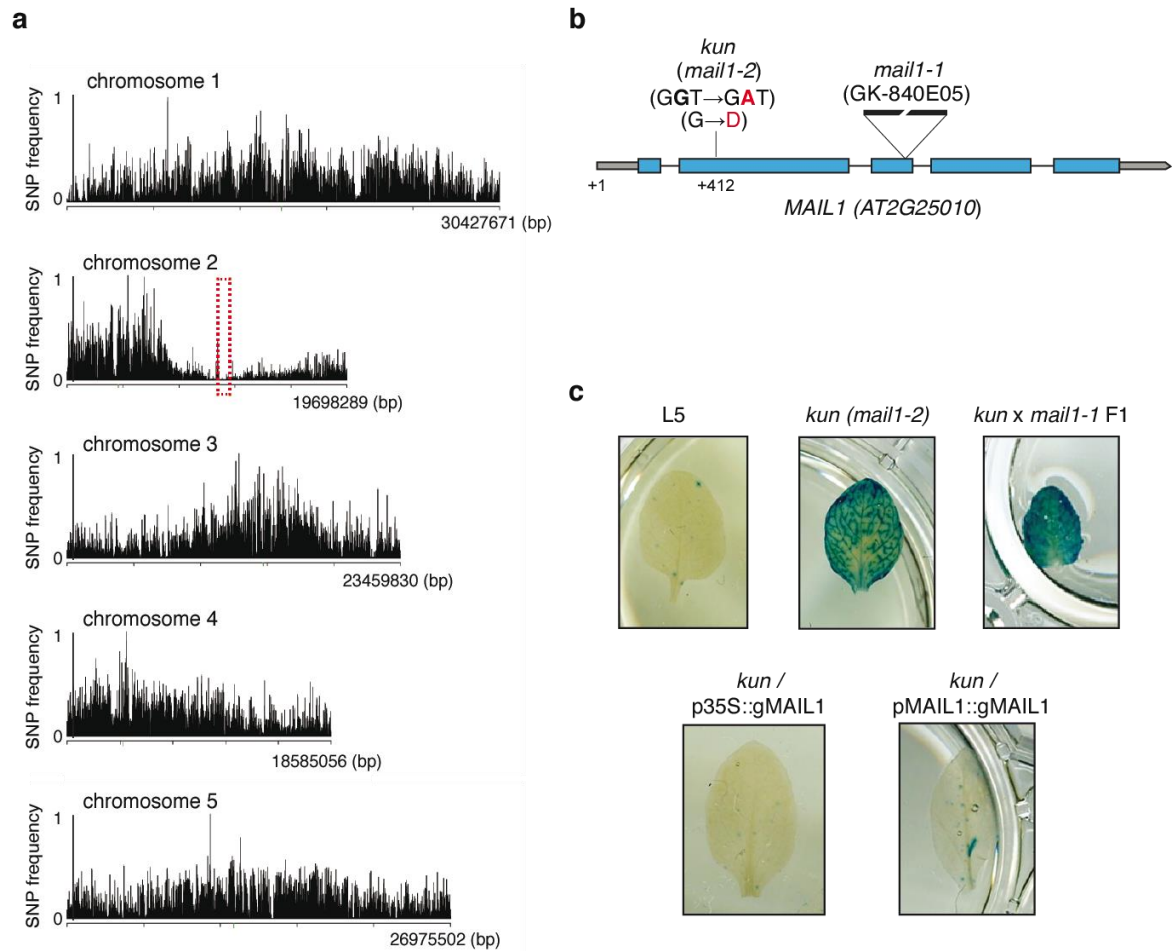

**Supplementary Figure 2.** A mutation in *MAIL1* is responsible for silencing defects in *kun*. **(a)** Mapping of *kun* mutation by mapping-by-sequencing. Distribution of Ler single nucleotide polymorphism (SNP) frequency along the five Arabidopsis chromosomes in the F2 Ler x *kun* mutant progeny. The dashed red box marks the linkage interval that shows depletion in Ler SNP frequency. **(b)** Representation of the *MAIL1* gene. Positions of the *kun* (*mail1-2*) point mutation and *mail1-1* T-DNA insertion are shown. **(c)** Representative images of histochemical staining for GUS activity in leaves from plants of the indicated genotypes.

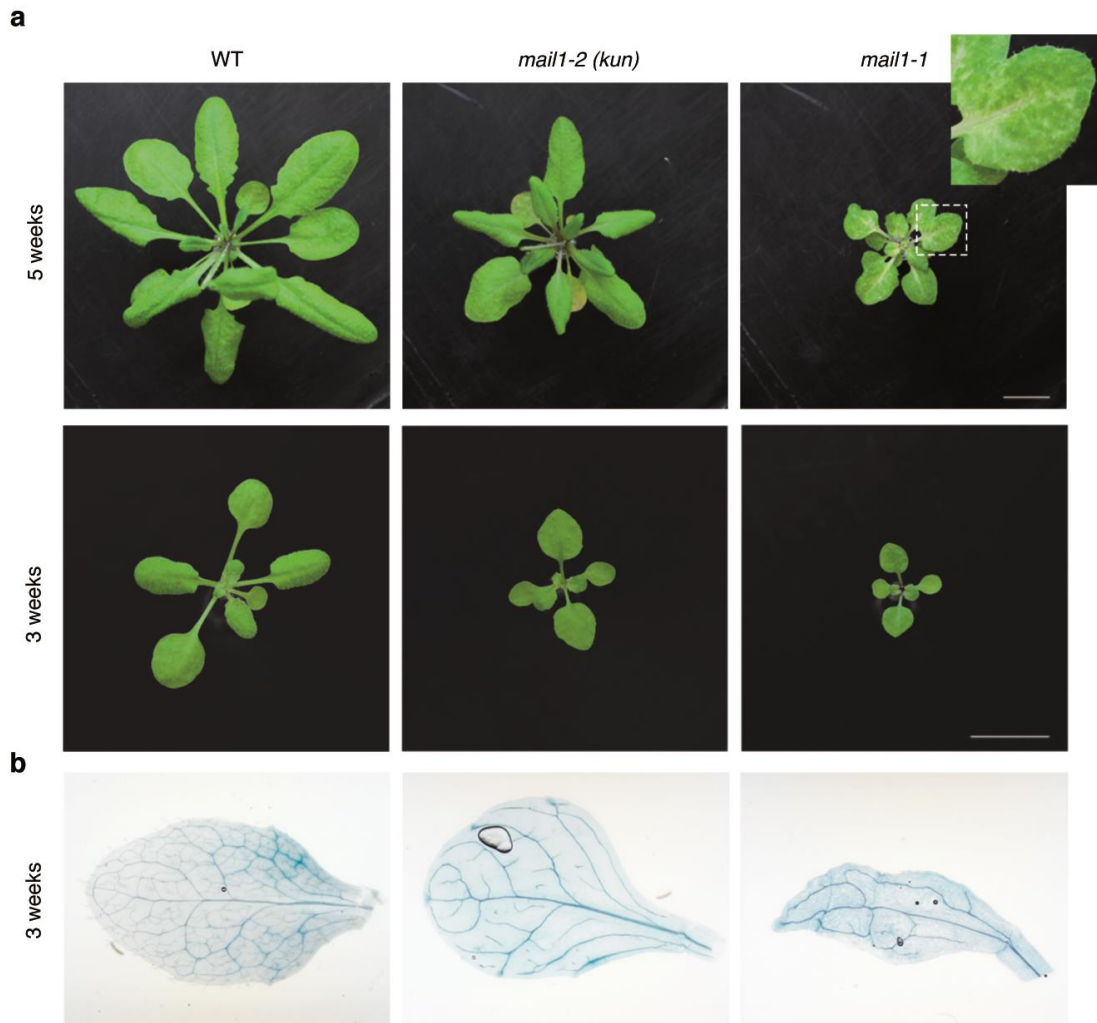

**Supplementary Figure 3.** Cell death is detectable in mature leaves only. **(a)** Representative photos of 5-week- and 3-week-old WT, *mail1-1* and *mail1-2* plants. Photos at 3 weeks are the same as those shown in Fig. 1b. A close-up view of a leaf of a 5-week-old *mail1-1* is shown (dashed box). Scale bar is 1 cm. **(b)** Trypan blue staining of isolated leaves from 3-week-old WT, *mail1-1* and *mail1-2* seedlings.

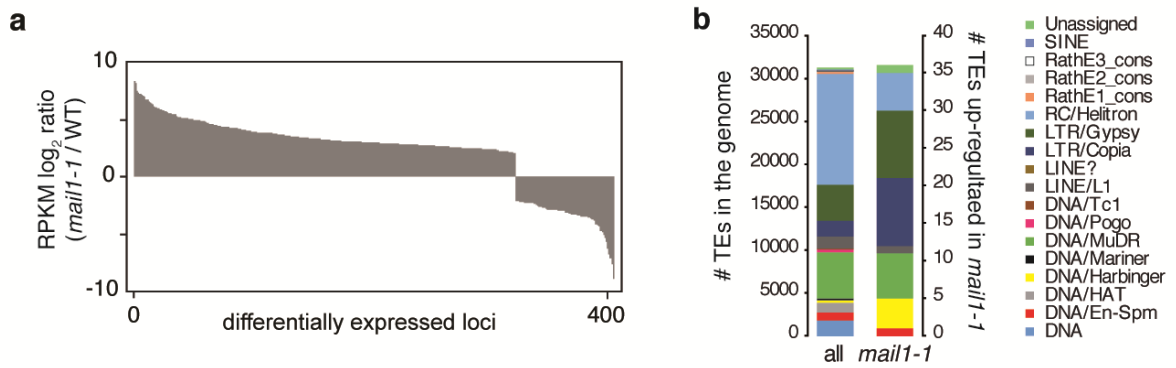

**Supplementary Figure 4.** The *mail1* mutation mainly induces upregulation of transcript levels. **(a)** Plot of the  $\log_2$  fold change for individual differentially expressed loci (ranked highest to lowest). **(b)** Number and superfamily-classification of TEs overexpressed in *mail1-1*. The distribution of TEs in the *Arabidopsis thaliana* genome (all) is shown for comparison.

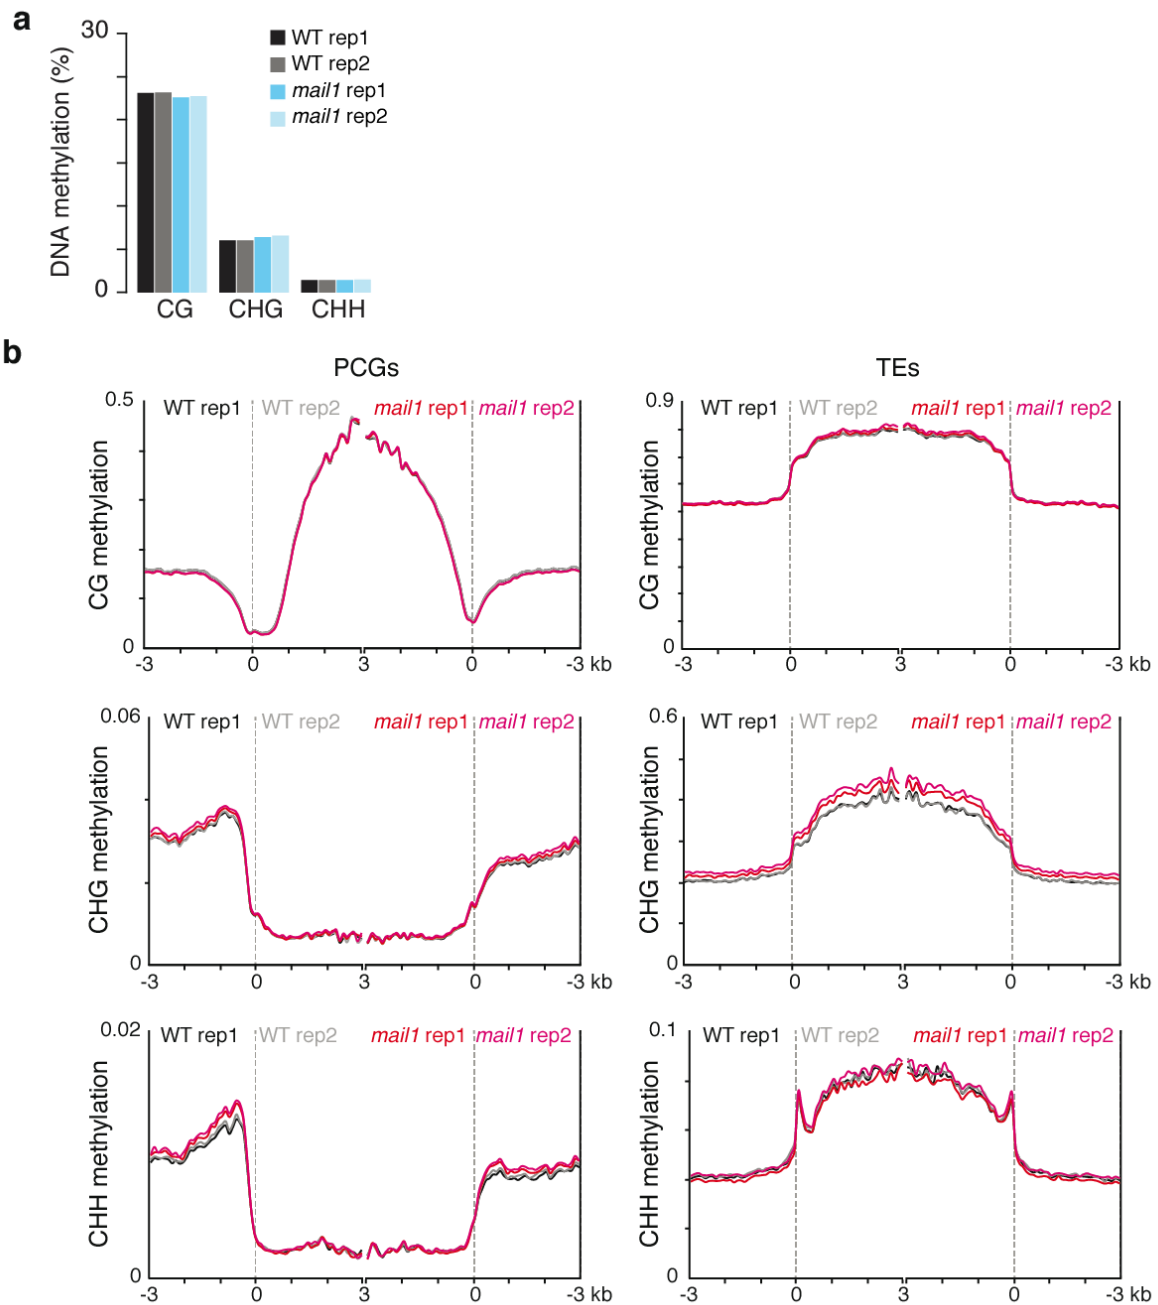

**Supplementary Figure 5.** The *mail1* mutation has no significant impact on global DNA methylation patterns (a) Average levels of CG, CHG and CHH methylation in WT and *mail1* plants. (b) Average levels of CG, CHG and CHH methylation along all protein-coding genes (PCGs) and TEs. PCGs and TEs were aligned at the 5' end or 3' end, and average methylation levels for all cytosines within each 100-bp bins are plotted from 3 kb away from the annotation (negative numbers) to 3 kb into the annotation (positive numbers). The dashed lines represent the points of alignment.

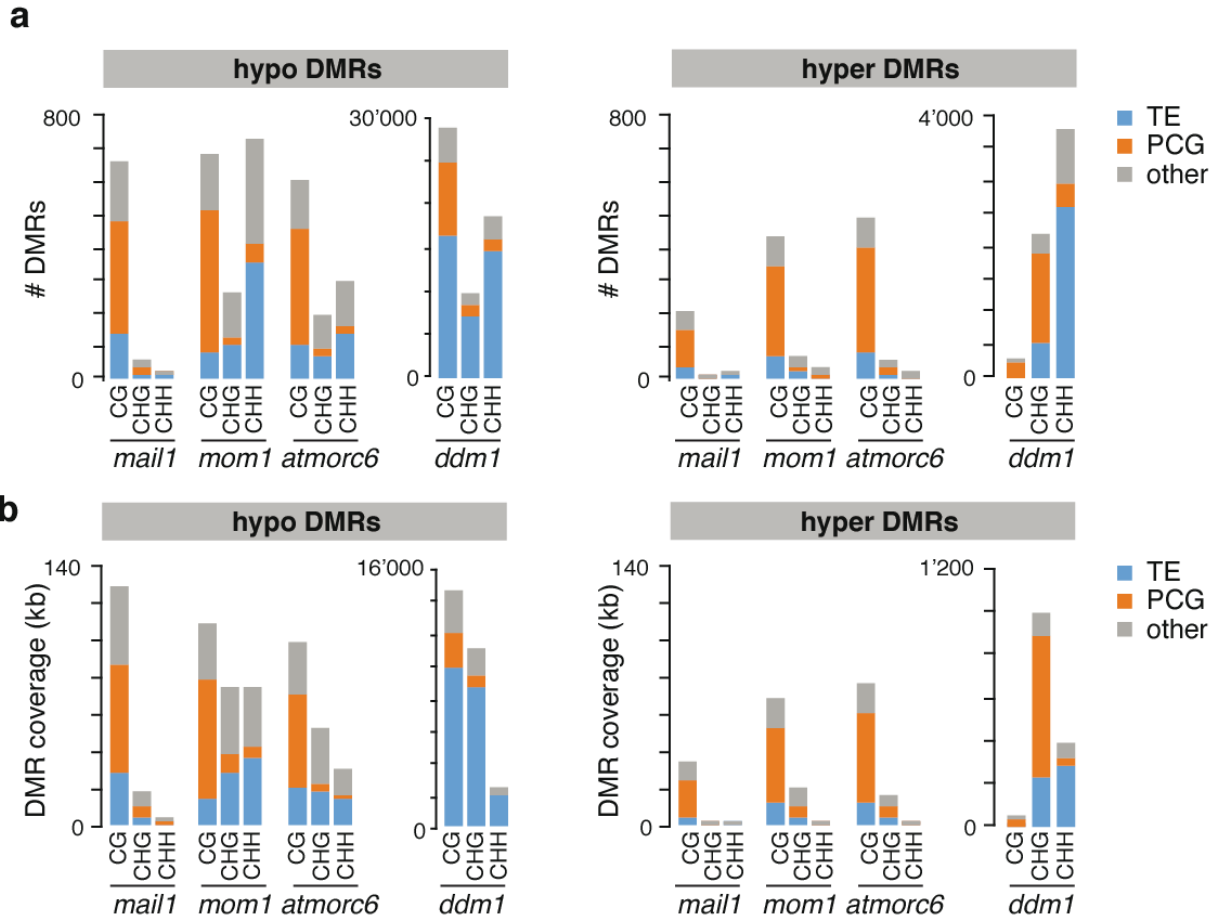

**Supplementary Figure 6.** Minor DNA methylation changes in *mail1*, *mom1* and *atmocr6* mutants. Number (**a**) and total length (**b**) of differentially methylated regions showing hypermethylation (hyper DMRs) or hypomethylation (hypo DMRs) in the indicated genotypes.

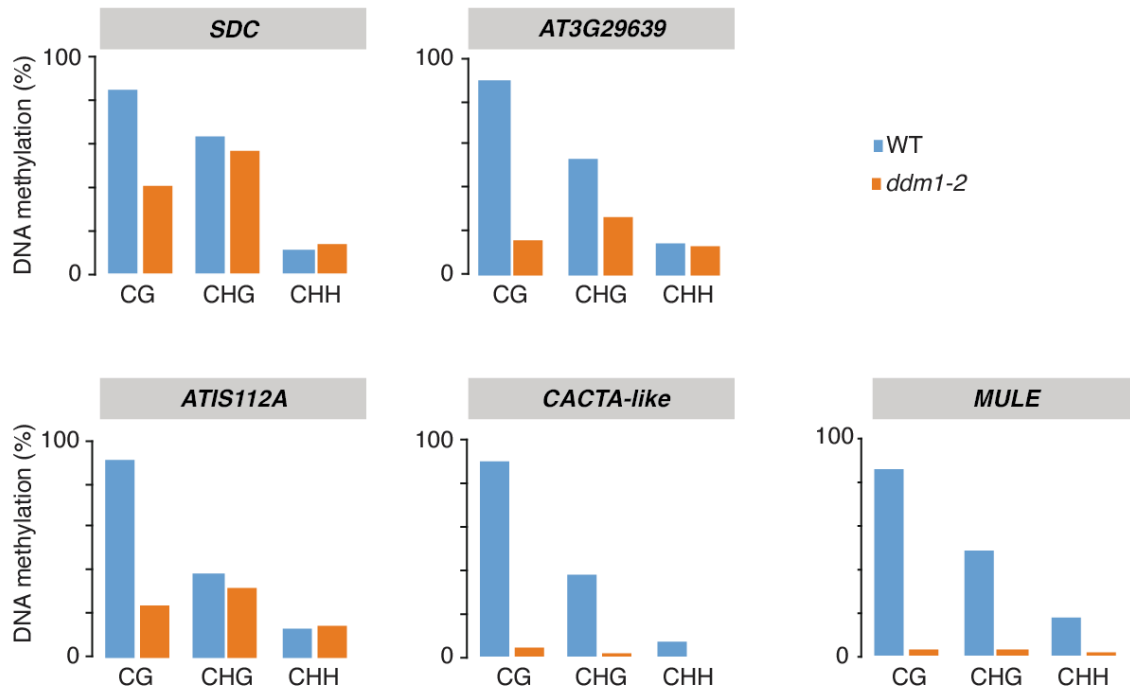

**Supplementary Figure 7.** Average levels of CG, CHG and CHH methylation in WT and *ddm1-2* at two genes and three TEs upregulated in both *mail1* and *ddm1-2*. DNA methylation levels were calculated based on published BS-seq data<sup>1</sup>, for 1 kb upstream of the annotation transcription start site (*SDC* and *AT3G29639*) or 1 kb centered on the annotation start site (*ATIS112A*, *CACTA-like* and *MULE*).

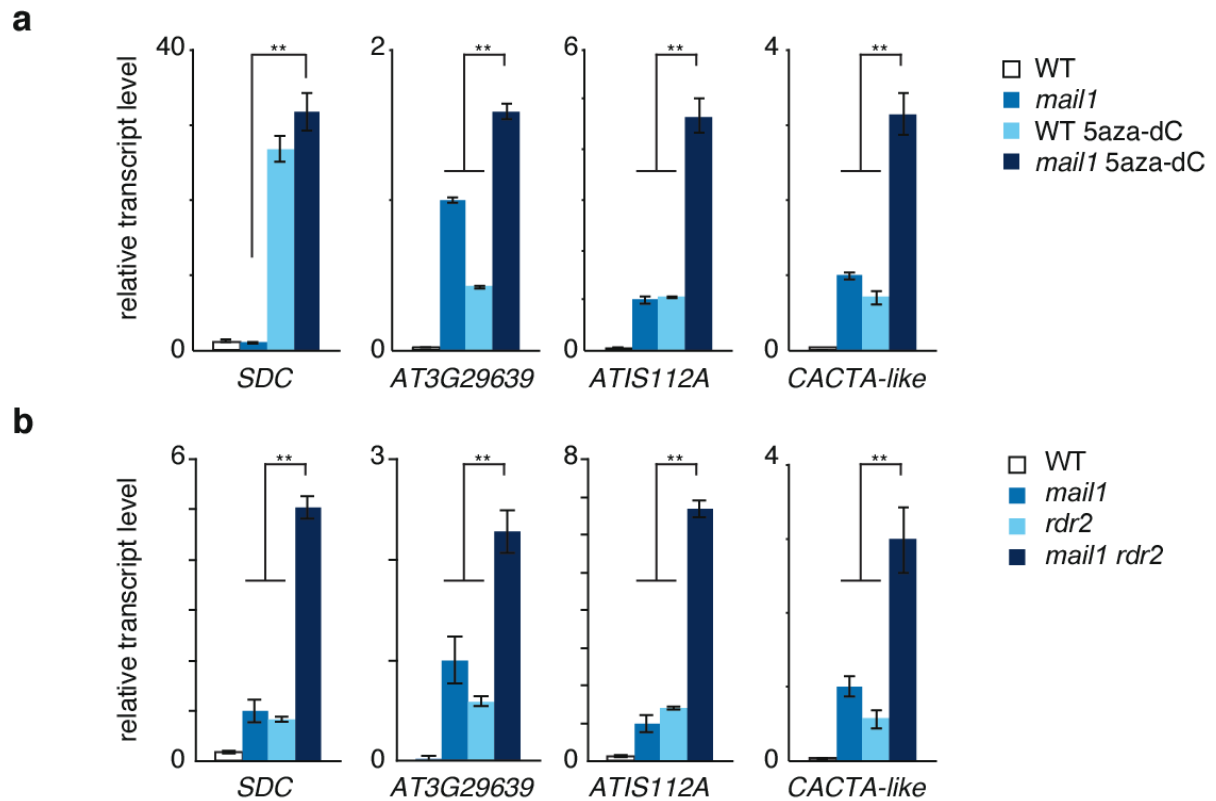

**Supplementary Figure 8.** *MAIL1* silencing function is independent of DNA methylation and siRNA pathways. **(a, b)** Reverse transcription quantitative polymerase reaction (RT-qPCR) expression analysis of *mail1*-upregulated loci using RNA of WT and *mail1* seedlings treated or not with DNA methylation inhibitor 5-aza-2'-deoxycytidine **(a)** or immature flowers from WT, *mail1*, *rdr2* and *mail1 rdr2* **(b)**. Transcript levels are represented relative to *mail1*, set to 1; values represent means from at least two biological replicates  $\pm$  s.e.m. Asterisks mark statistically significant differences (Student's *t*-test,  $P < 0.05$ ).



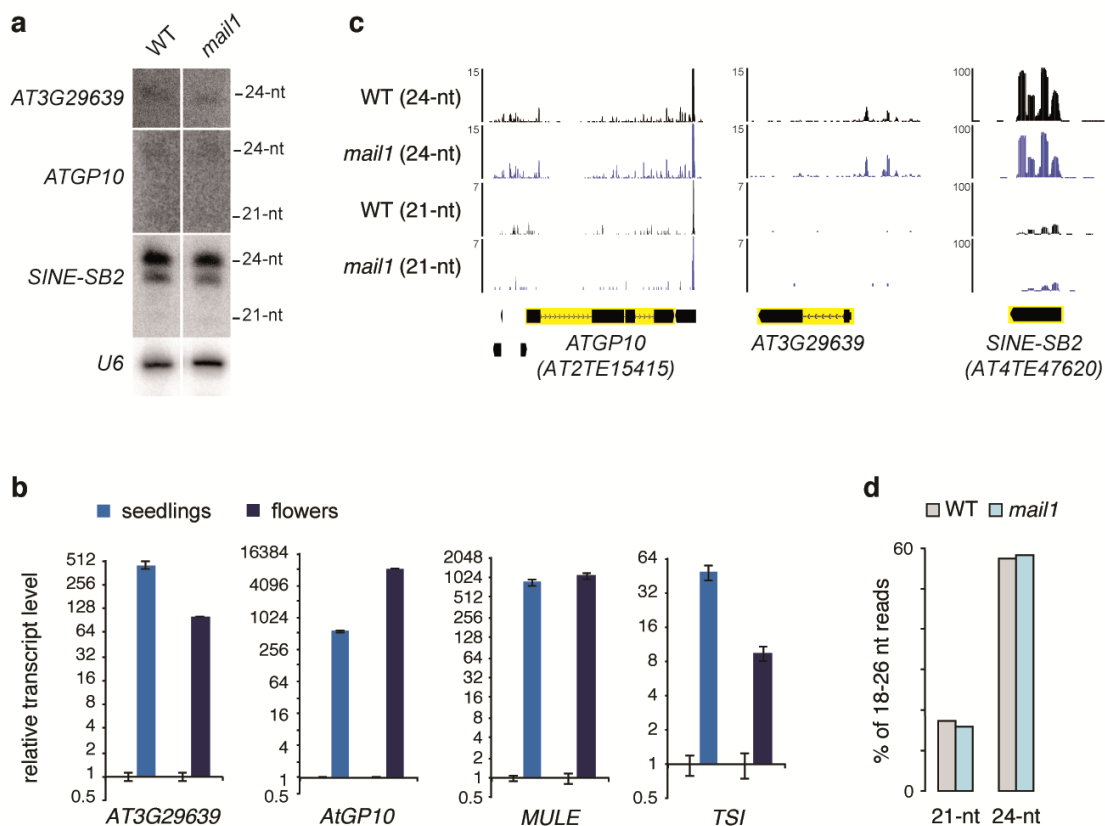

**Supplementary Figure 9.** Misexpression of genes in *mail1* mutants is not associated with changes in siRNA accumulation. **(a)** RNA gel blot analysis of siRNA accumulation at the indicated loci. U6 RNA hybridization is shown as a loading control. **(b)** The *mail1* mutation induces loss of silencing in seedlings and flowers. RT-qPCR expression analysis of *mail1*-upregulated loci using RNA of WT and *mail1* seedlings or immature flowers. Transcript levels are represented relative to WT, set to 1; values represent means from at least two biological replicates  $\pm$  s.e.m. **(c)** Genome-browser view of normalized 21- and 24-nt siRNA read counts along the loci analyzed in (a). **(d)** Overall levels of 21- and 24-nt siRNAs in flower tissues are not altered by *mail1* mutation. The amount of 21- and 24-nt siRNAs is expressed as a percentage of total 18-26-nt mapped RNAs in each genotype.

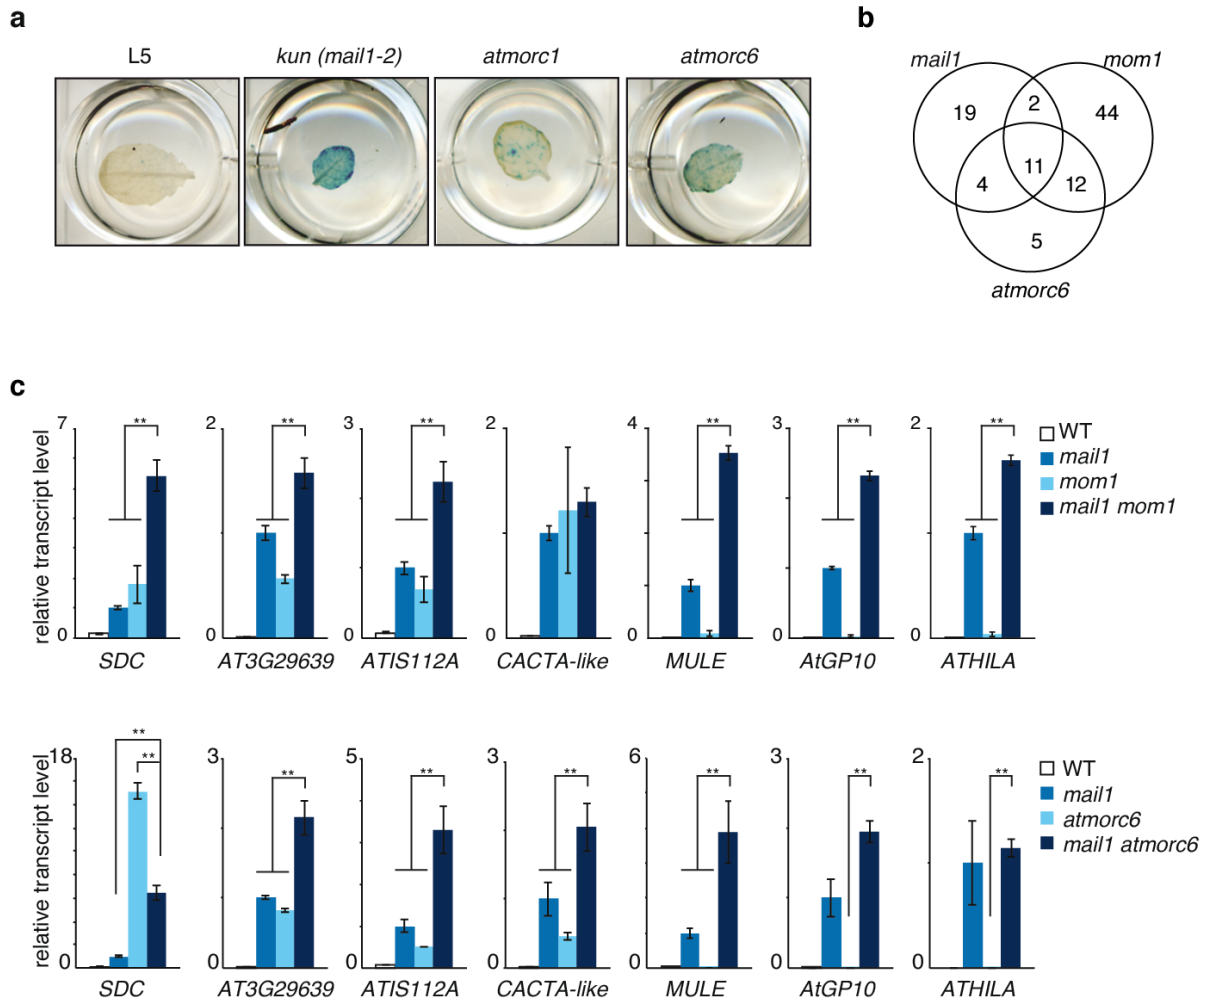

**Supplementary Figure 10.** *MAIL1* regulates silencing independently of the *MOM1* and *AtMORC6* pathways. (a) Representative images of histochemical staining for GUS activity in leaves from plants of the indicated genotypes, all carrying in the L5 GUS transgene. L5 silencing is released in *atmorc6* and *atmorc1*, albeit to a lesser extent than in *mail1*. (b) Venn diagram of overlap between TEs transcriptionally derepressed in *mail1*, *mom1* and *atmorc6* mutants. (c) RT-qPCR expression analysis of *mail1*-upregulated loci using RNA from immature flowers of the indicated genotypes. Transcript levels are represented relative to that in *mail1* set to 1; values represent mean from at least two biological replicates  $\pm$  s.e.m. Asterisks mark statistically significant differences of double vs single mutants (Student's *t*-test,  $P < 0.05$ ).

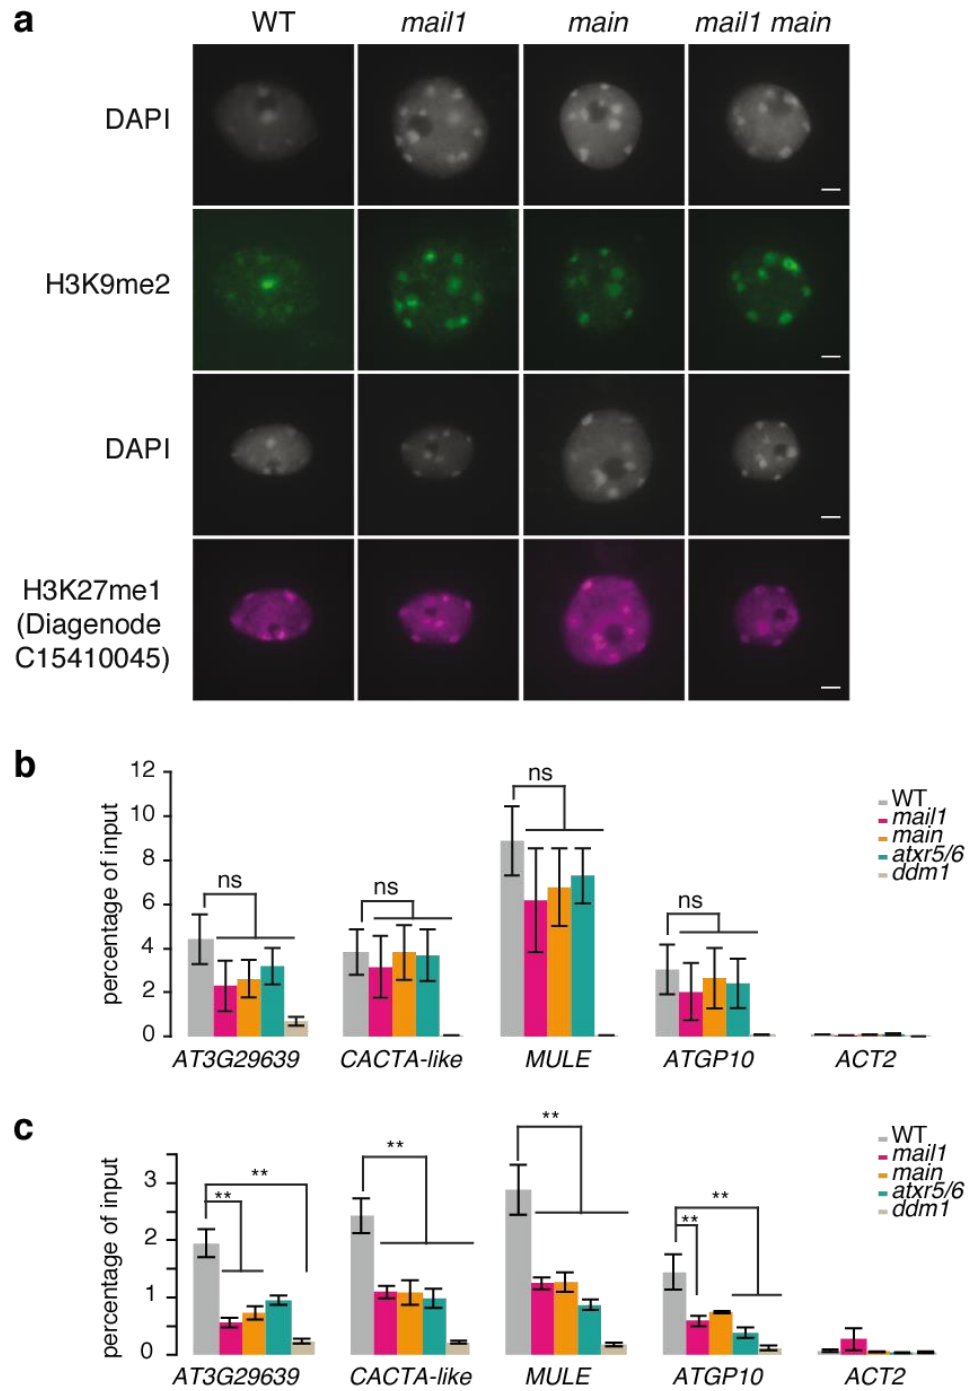

**Supplementary Figure 11.** Patterns of H3K9me2 and H3K27me1 in *mail1* and *main* mutants. (a) Representative images of immunolocalization experiments showing the distribution of H3K9me2 and H3K27me1 in leaf interphase nuclei of WT, *mail1*, *main* and *mail1 main*. Scale bars, 2  $\mu$ M. (b, c) ChIP analysis of H3K9me2 (b) and H3K27me1 (c) at loci upregulated in *mail1*. Relative amount of immunoprecipitated DNA is expressed as percentage of input, as determined by real-time PCR. Data are shown as means  $\pm$  s.e.m. of at least three independent experiments. *ACT2* (*AT3G18780*) was used

as a negative ChIP control, while *ddm1* and *atxr5/6* were included as positive controls for depletion in H3K9me2 and H3K27me1, respectively. Asterisks mark statistically significant differences from the WT (Student's *t*-test,  $P < 0.05$ ); n.s., non-significant differences from the WT (Student's *t*-test,  $P > 0.13$ ).

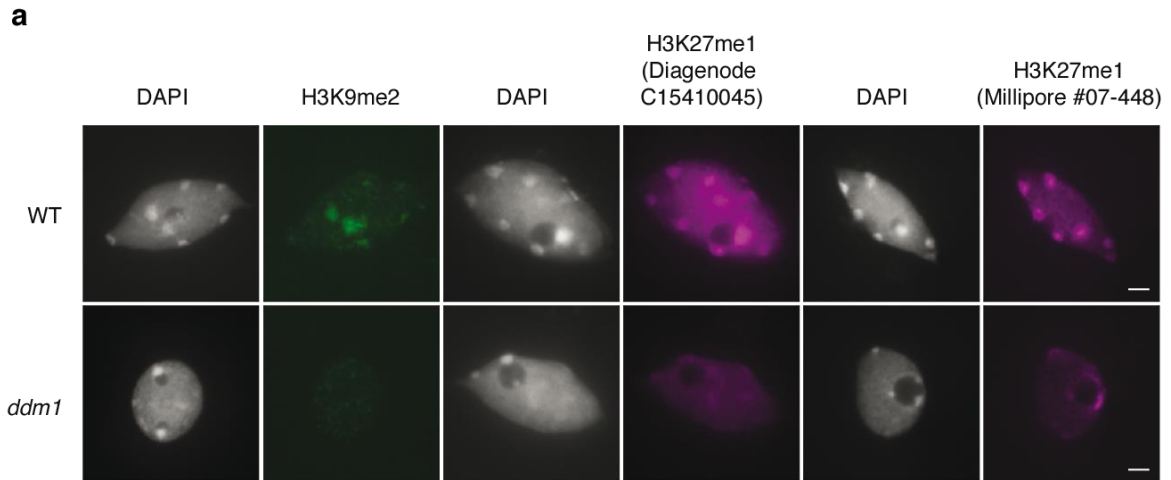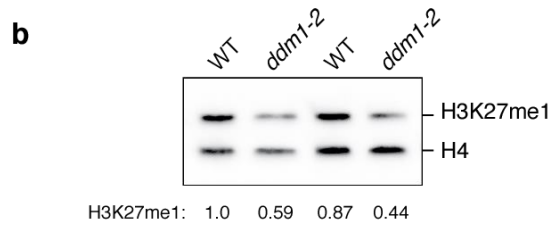

**Supplementary Figure 12.** Mutation in *DDMI* correlates with H3K27me1 depletion. **(a)** Representative images of immunolocalization experiments showing the distribution of H3K9me2 and H3K27me1 using two different antibodies in leaf interphase nuclei of WT and *ddm1-2*. Scale bars, 2  $\mu$ M. **(b)** Western blot analysis of H3K27me1 levels. Quantification of relative H3K27me1 levels was performed relative to H4 and to an arbitrary selected WT sample lane set to 1.

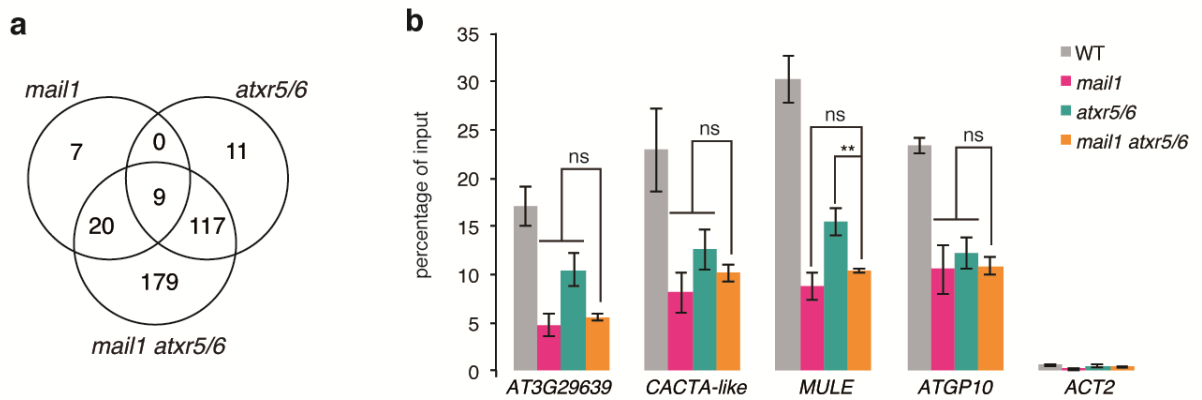

**Supplementary Figure 13.** *MAIL1* and *ATXR5/6* largely act through distinct silencing pathways. **(a)** Venn diagram of upregulated TEs in the indicated genotypes showing that *MAIL1* and *ATXR5/6* pathways act redundantly to regulate a large set of TEs, which shows significant upregulation specifically in *mail1 atxr5/6* triple mutants. **(b)** ChIP analysis of H3K27me1 at loci upregulated in *mail1*. Relative amount of immunoprecipitated DNA is expressed as percentage of input, as determined by real-time PCR. Data were collected from three independent ChIP assays using the Diagenode antibody to H3K27me1 (C15410045) and starting from one cross-linked chromatin sample per genotype. Data are shown as means  $\pm$  s.e.m. *ACT2* (AT3G18780) was used as a negative ChIP control. Asterisks mark statistically significant difference between the *mail1 atxr5/6* triple mutant and the *atxr5/6* mutants (Student's t-test,  $P < 0.05$ ); ns, non-significant differences from the *mail1 atxr5/6* triple mutant (Student's t-test,  $P > 0.07$ ).

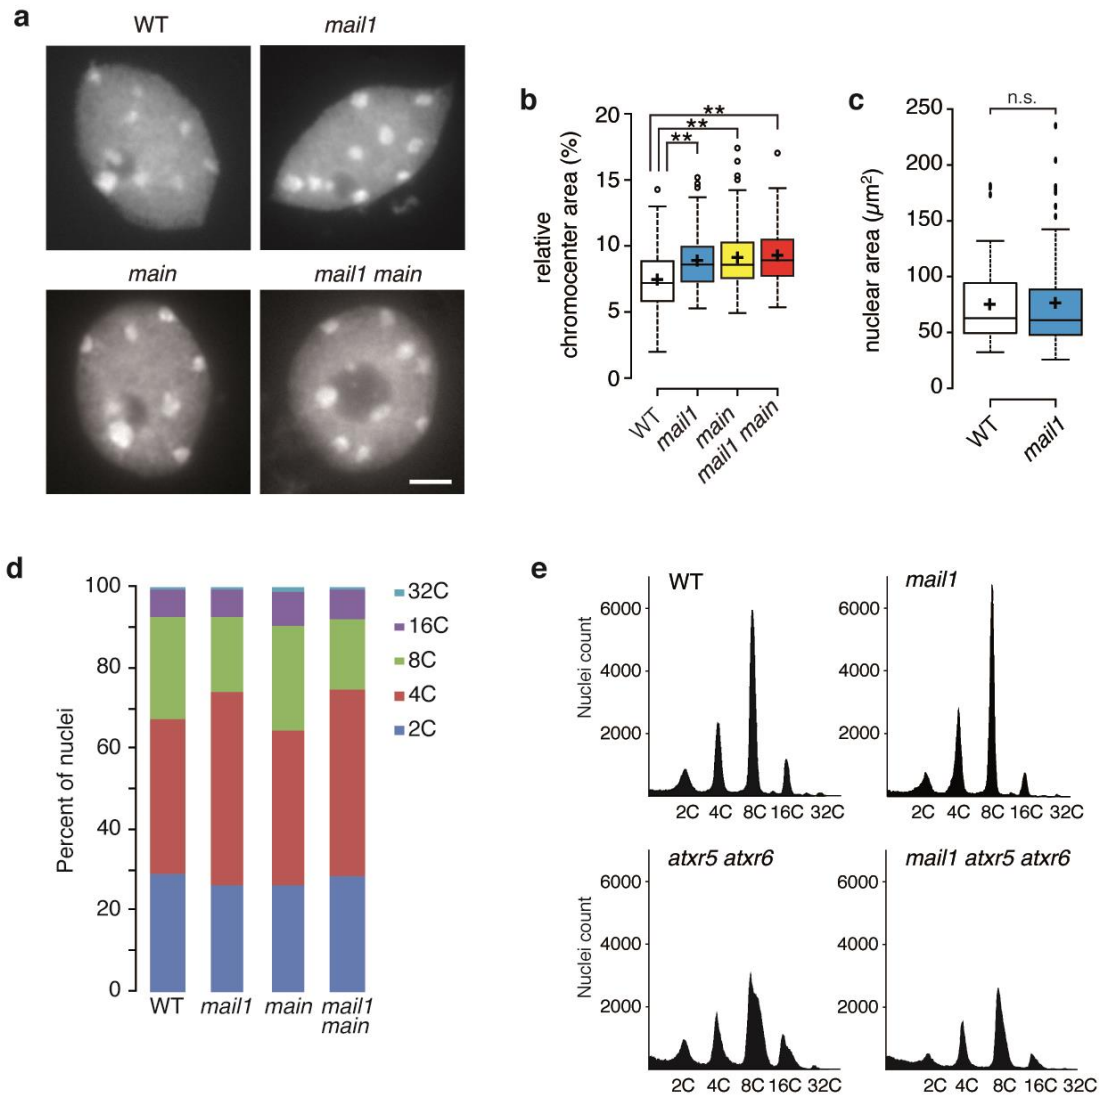

**Supplementary Figure 14.** The *mail1* and *main* mutations do not associate with endoreduplication defects, but impact on chromocenters compaction (**a**) Decondensed chromocenters observed in representative nuclei of *mail1*, *main* and *mail1 main* leaves, stained with DAPI. Scale bar, 2  $\mu\text{m}$ . (**b**) Quantification of the chromocenter area relative to the entire nucleus, demonstrating expansion of heterochromatin in *mail1*, *main* and *mail1 main* nuclei. 115-125 nuclei were scored per genotype. Data were plotted as in Fig. 4d. Asterisks mark pairwise comparisons showing statistically significant differences (Kruskal-Wallis method using Dwass-Steel-Critchlow-Fligner post hoc tests,  $P < 10^{-4}$ ). (**c**) Quantification of the area of whole nuclei isolated from WT and *mail1* three-week-old seedlings. 69 and 87 nuclei were scored for WT and *mail1* genotypes, respectively. Data were plotted as in (b). No statistically significant difference was observed (Wilcoxon rank sum test,  $P = 0.77$ ). (**d**) Comparison of the DNA contents in nuclei of two/three-week-old WT, *mail1*, *main* and *mail1 main* seedlings. (**e**) Flow cytometry profiles of the DNA contents of nuclei from fifth and sixth expanded rosette leaves of five-week-old WT, *mail1*, *atxr5 atxr6* and *mail1 atxr5 atxr6* plantlets.

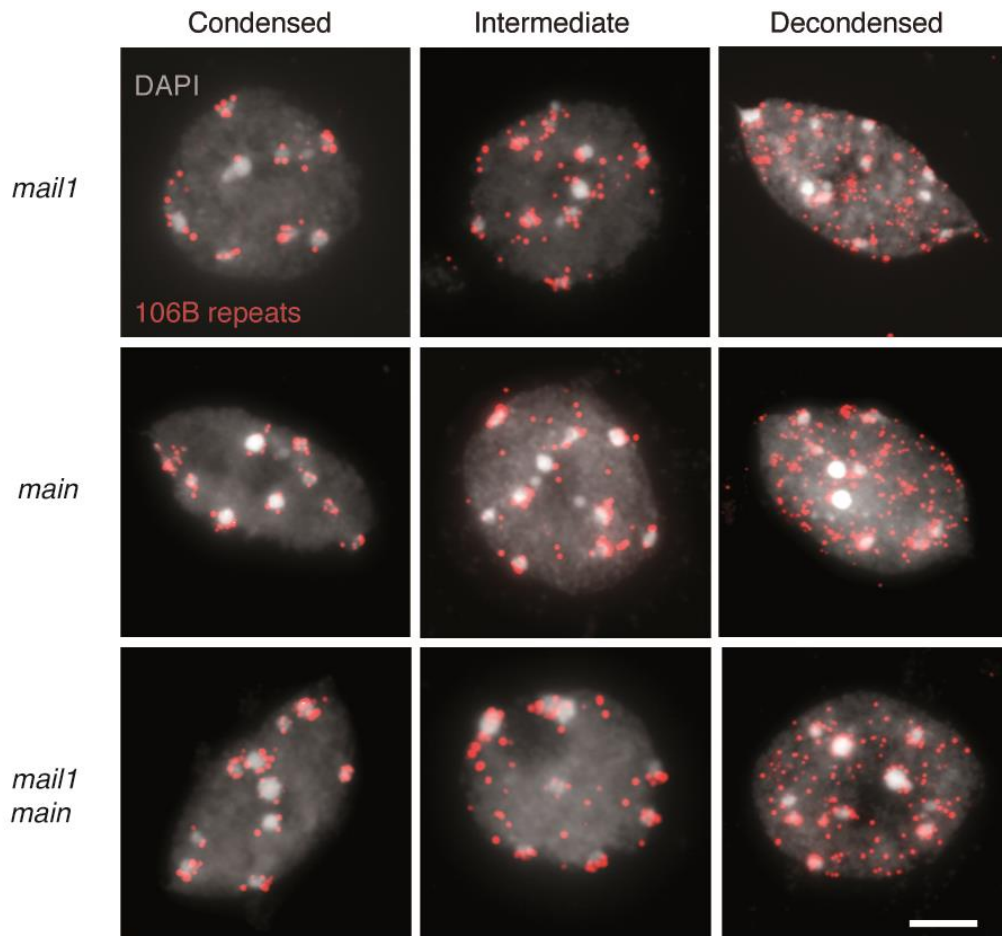

**Supplementary Figure 15.** Representative images of the three chromatin condensation states observed in leaf interphase nuclei of the indicated mutant genotypes hybridized with a probe for 106B pericentromeric repeats and counterstained with DAPI. Scale bar, 3  $\mu$ m.



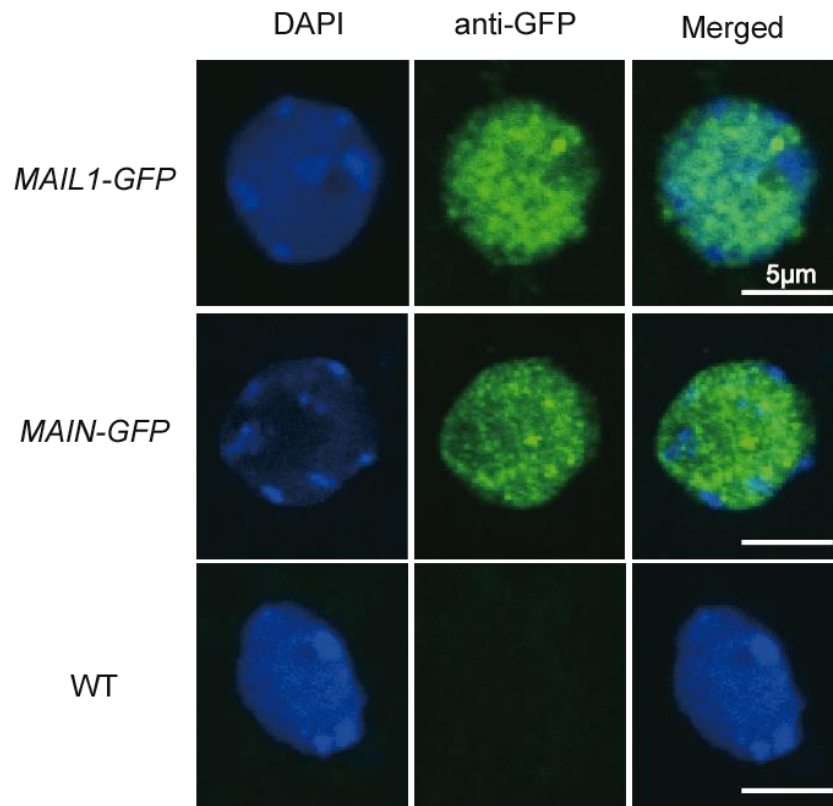

**Supplementary Figure 16.** Representative images of the immunodetection of MAIL1- and MAIN-GFP fusion proteins using an anti-GFP antibody. Nuclear DNA was counterstained with DAPI.

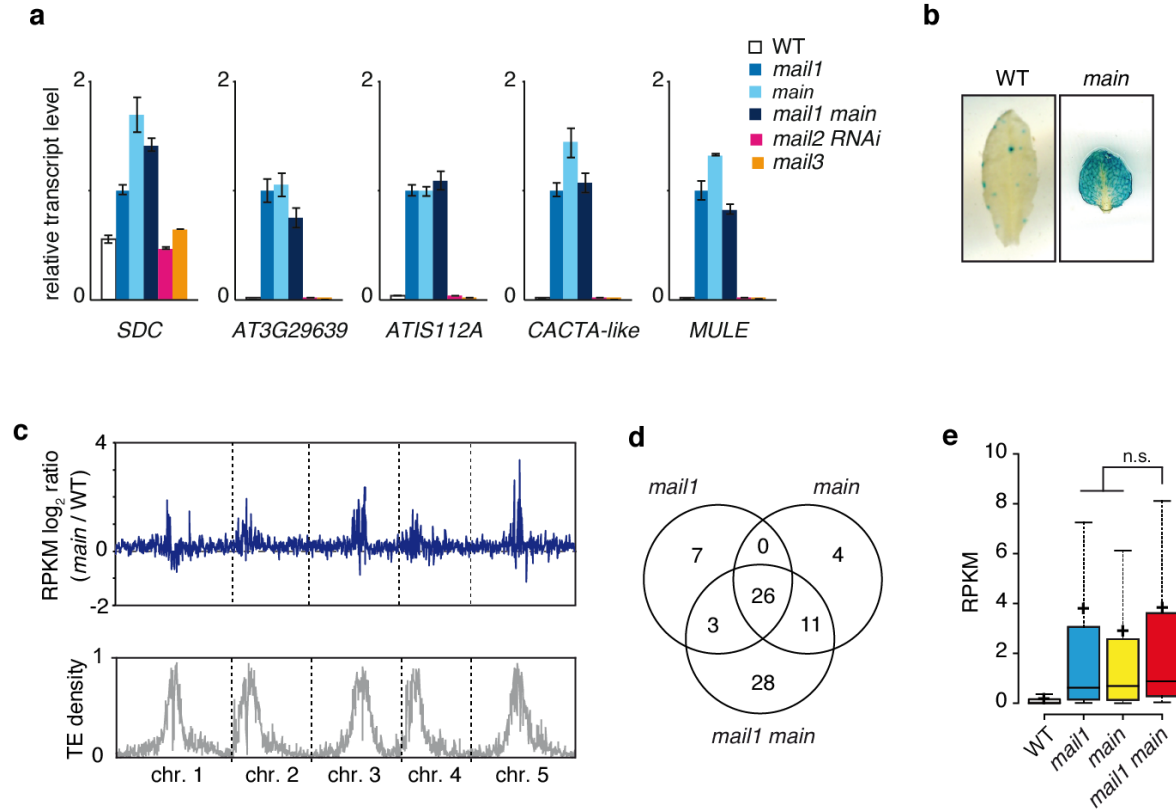

**Supplementary Figure 17.** *MAIN*, the closest *MAIL1* homolog, functions similarly to *MAIL1* to maintain gene silencing. **(a)** RT-qPCR expression analysis of *mail1*-upregulated loci using RNA from seedlings of the indicated genotypes. Transcript levels are represented relative to those in *mail1* mutants, which are set to 1; values represent mean from at least two biological replicates  $\pm$  s.e.m. **(b)** The L5 locus was strongly reactivated in leaves of *main* mutant plants, while WT plants carrying the L5 transgene showed no GUS-staining. **(c)** Loci upregulated in *main* mostly localize to pericentromeric heterochromatin. Overview of the five *A. thaliana* chromosomes showing the  $\log_2$  ratios (*main*/WT) of mean RPKM values in 100 kb windows. The lower panel shows TE density in 100 kb windows along chromosomes. **(d)** Venn diagram of overlap between TEs upregulated in *mail1*, *main* and *mail1 main* mutants. **(e)** Boxplot showing normalized expression level (RPKM) of TEs upregulated in *mail1 main* double mutant in the indicated genotypes. Data were plotted as in Fig. 4d and outliers were removed. n.s., non-significant (unpaired, two-sided Student's *t*-test, [*mail1 main* vs. *mail1*,  $P > 0.97$ ] and [*mail1 main* vs. *main*,  $P > 0.41$ ]).

```

MAIL1          1  --GYRKGIPMSLNNSTLSALVERWRRETNTFHLPLGEMTITLDEVALVLCLEIDG----
Mdl14Gypsy-43 1  YDAILLSSMEIVPKKELLLAALCFWCSATNTMVLPLGPIGPTIIDITAILGTSATG----
Vv7Gypsy-34_VV- 1  YEATFASLFSYDRHASVIRAFCEWCPPTTNLETSIGEVSISLWDLYRIAGLPIIGSFYD
Atr7MuDR-11_Atr 1  -----IDCSLLRAFIGWCKVNTARLXVGVVTEPLLVDVWHILRIPVTC----
Osl6MuDR-1     1  -----FNAPALATALVDRWRPETHSFLPSGEMTITLQDVAMILALPLRG----

MAIL1          55 --DPIVGSKVGD-----EVAMDMCGRLG--KLPSAANKEVNC SRVKLNWLKRT--F
Mdl14Gypsy-43 57 --IPVDATLSCHPSNIDTKTLFDRRAFETLNRDGHIPSKS---DIQKLRKFCNRYNTLY
Vv7Gypsy-34_VV- 61 EMVPSAEELSNDAKSSLPSCRNLFLAYHRICSETKGS--SVKLASWVSFWYKGSMKY
Atr7MuDR-11_Atr 45 --EPTVCIRPKD-----YMAFIMEYLC--DCENGD---KLSRLRHTWLRTK--F
Osl6MuDR-1     45 --HAVTGRRET-----EGWRAGVEQLFCIPLNIEQGQGGKKQNGIPIPSWLSQN--F

MAIL1          101 SECPED-----ASFDVVKCHTRAYLLY
Mdl14Gypsy-43 111 LHFAGR-----GEEDLRGEHEAFLFY
Vv7Gypsy-34_VV- 119 AKPPKKSTRNKAQRPKETHNPSGEIDPIKSRTOSEMEVFDLGLVREADVKETYLAAFLAC
Atr7MuDR-11_Atr 85 EQLPKK-----PTKLLQHXRAYLLY
Osl6MuDR-1     93 SHLDDD-----AEPWRVECYARAYLH

MAIL1          123 LIGSTIFATTDGDKVSVKYLPLFDFDQAGRYAWGAALACLRYRAGNASLK-S-QSNIC
Mdl14Gypsy-43 133 WYNKTHCCTKS-NKCLVENMPVABALASCHVLALSSNLAQLRCLAEATLHKV-DPHQN
Vv7Gypsy-34_VV- 179 WLCRFVLPWGGVNLIRPGVFKVASRMAOGETFSLVLVVLASINGLNEIACSSKPGTNAS
Atr7MuDR-11_Atr 107 LVGTFIFADASQRSTLTSVLOLF-----RACKW-KK
Osl6MuDR-1     115 LLGGVLFPPDAGCDIASAIWIPLVANLGDLGFRSWGSAVLAWTYRQICEACCRQAFSSNMS

MAIL1          181 -GCTLLQCSYFHL-----D-IGRPEKSEACFP-----LALLWKGK
Mdl14Gypsy-43 191 -GPLWVFQWLQVYFASLRPAIADFSPTALGFPOLASRPTPPHQA---EAVFRYLF-AL
Vv7Gypsy-34_VV- 239 IFPIHYLYGWLGEYF-----DTHFISPSWNHPEPRTMYTA---GFSAKCF--D
Atr7MuDR-11_Atr 130 ---EFLQCNVYEH-----PXLXSKPTTITIEMP-----RACKW-KK
Osl6MuDR-1     175 -GCVLLIQLWMLRL-----P--VGRPKWRQSFPPWPVNEPDMERTVAYLF---

MAIL1          216 GSRSKTDLSEYRR-----ELDDIDPSKITWCPYERFENLIIPHI--KAKLILGRS--
Mdl14Gypsy-43 245 DDLSENDEFLICRRRDVPS-----SIRLPTSTWSAEEDAD--LRQT--WGSFVLAR--
Vv7Gypsy-34_VV- 282 DSQAQALIMSCRGVKLDH-----IALRHKERVHWTDNES---ISVT--KASYLISLR--
Atr7MuDR-11_Atr 164 QPRRRDPLTTFDDISIDMVCYLWCLCNCRVWOPVEYS---PRDTLSKENALC-----
Osl6MuDR-1     218 --ESTATAHAHRDVAVYKVVNEMDCLQPPHIEWLPHYHTNE---ASSL--TLNSMCMNRDSD

MAIL1          264 ---KTTL-VC--FEKTELHFPRCLROFCRKO--PIPLKVKRRDRKNRRLDDLDTS--
Mdl14Gypsy-43 291 ---DLPL-GCDGKRSGWEVYHNFRLARQLCYLOGCPVPLLSSRTVLSRCRPRSSSEKEC
Vv7Gypsy-34_VV- 329 ---SSYLSLROGNHRVQPYYPHFRFSROFGYPO--DLPGLPEIFRTGTLEAVYQHW--
Atr7MuDR-11_Atr 216 ---RSYL-IC--FNIAEFYTPDRV-ROFGMMO--APVVGPPKWDREKVGLEHPTSW--
Osl6MuDR-1     271 YFMYQCPL-IC--FWAVEYHLPHRVMROFCRKO--DWPEVE---DISTGVELHKKYDR--

MAIL1          312 ---MS---LACEEWAERGDHIVDSPGGG-NVVDGAYMEWY
Mdl14Gypsy-43 346 RTAVREFOERCQKFRM--RPAETPEH-----CTDFGEWV
Vv7Gypsy-34_VV- 381 -----ESCRTLGTYSKVTIPDYHSLEEFSVTKAYADWW
Atr7MuDR-11_Atr 263 ---IDELSAEISDWROREBNIVKADVDKYGGMPTNEYMSWY
Osl6MuDR-1     319 ---VRT--KVKDWGLEHNYID-----EW-

```

**Supplementary Figure 18.** Amino acid sequence comparison between *MAIL1*- and TE-encoded PMDs. Alignment was made using two representative Gypsy-associated PMDs, two representative MULE-associated PMDs and the *MAIL1*-PMD. Identical and similar residues are shaded in black and grey, respectively. The *MAIL1*-encoded PMD is much closer to the MULE-encoded PMDs since both belong to the same evolutionary clade (PMD-C).

Fig. 1c

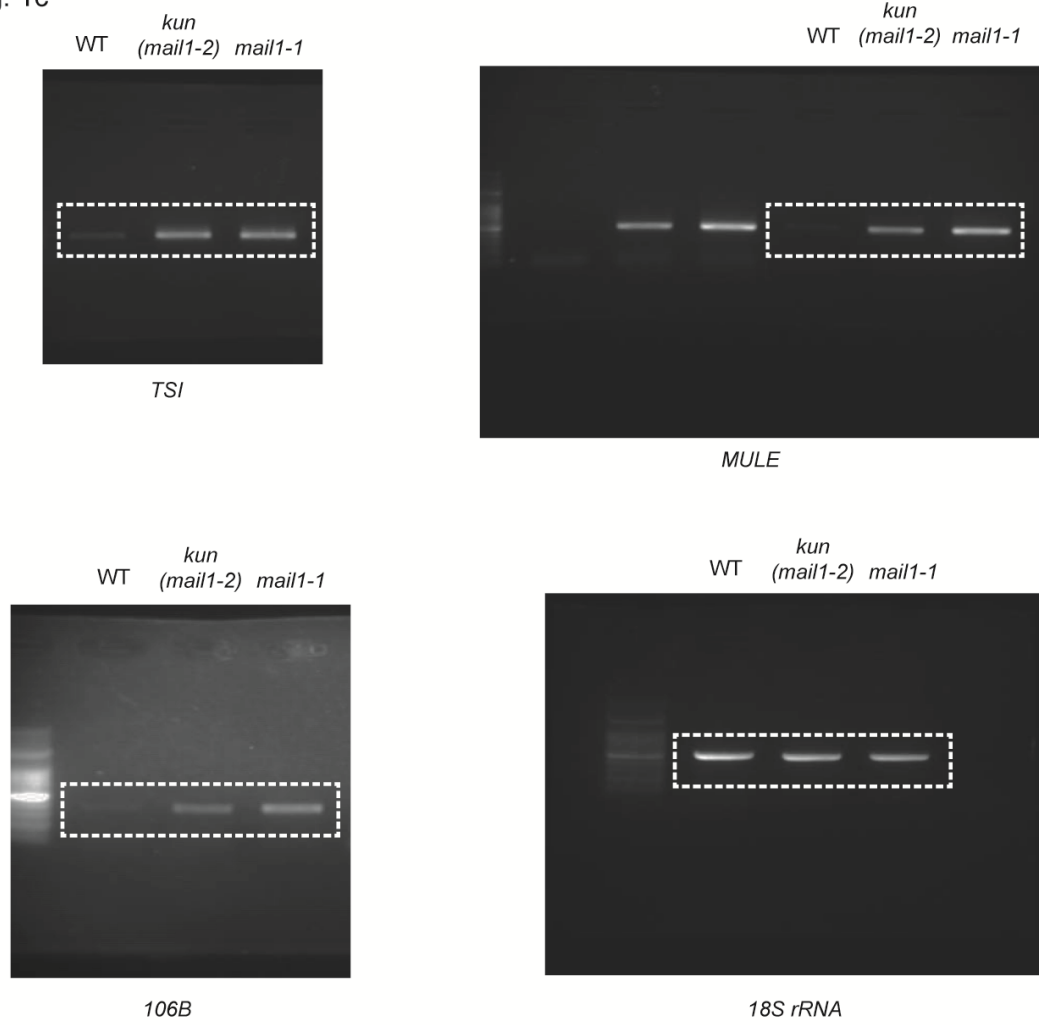

Fig. 4b

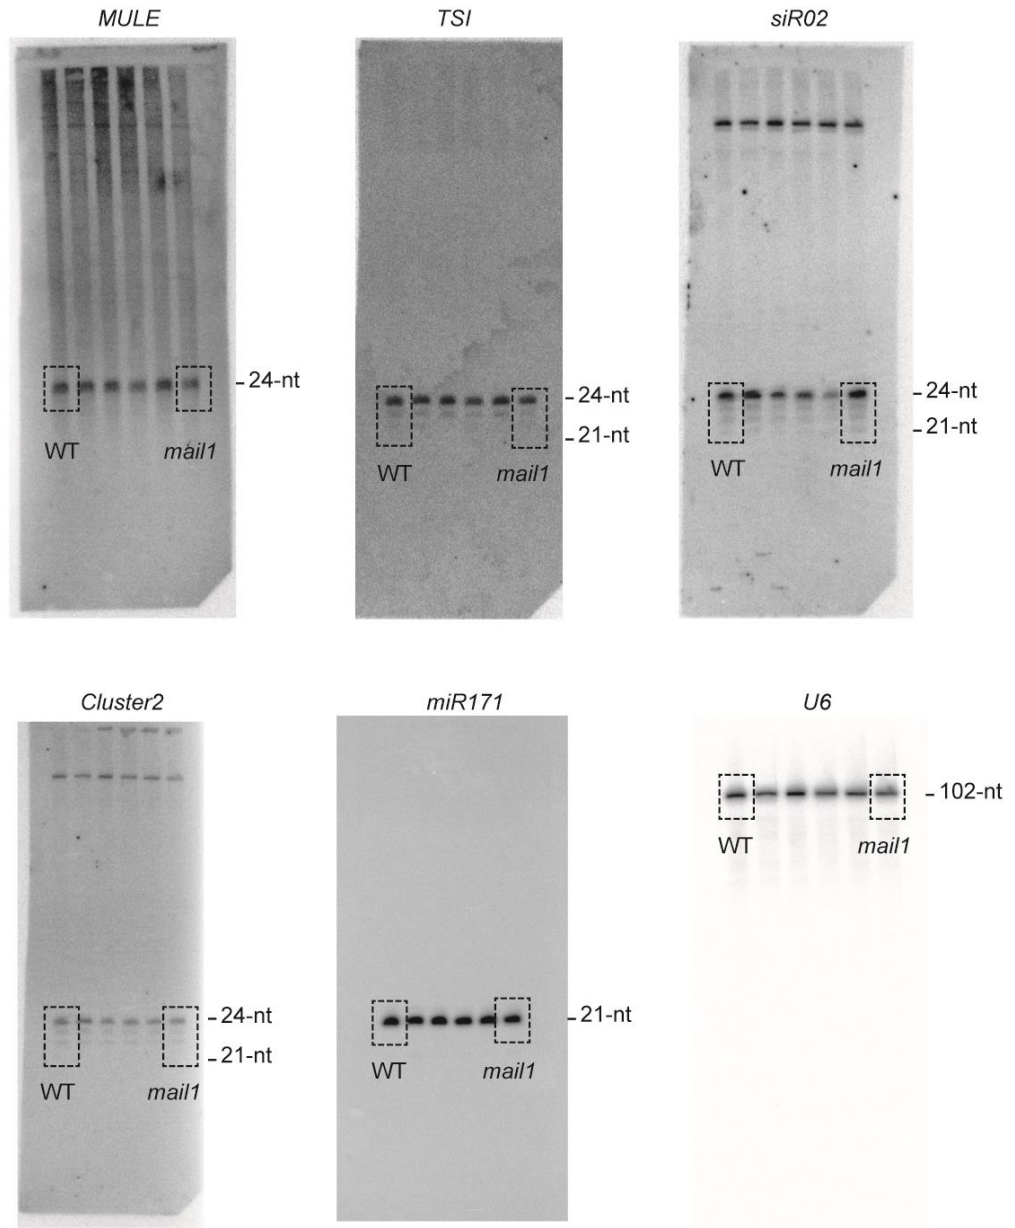

Supplementary Fig. 9a

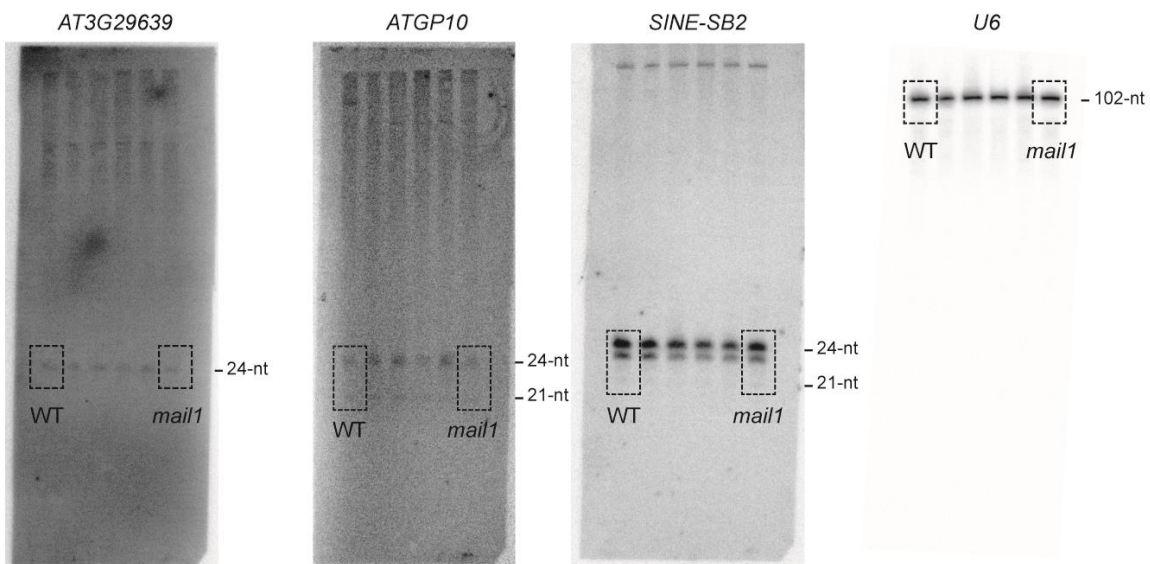

Supplementary Fig. 12b

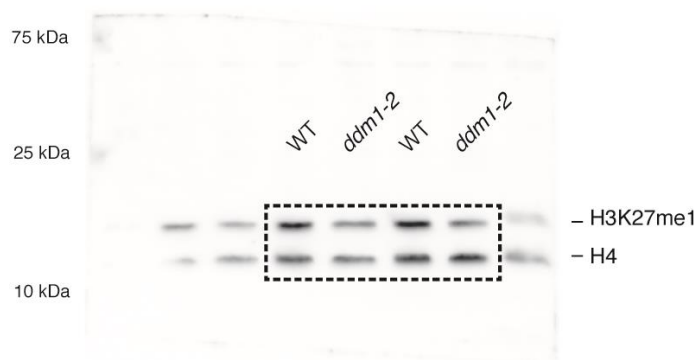

**Supplementary Figure 19.** Full-size images of gels, RNA gel blots and western blots shown in the indicated figures.

**Supplementary Table 1.** Species code used in Fig. 6.

| species                        | abbreviation                           |
|--------------------------------|----------------------------------------|
| <i>Aquilegia corulea</i>       | Ac                                     |
| <i>Amborella trichopoda</i>    | Atr                                    |
| <i>Arabidopsis thaliana</i>    | At, MAIL1,<br>MAIL2,<br>MAIL3,<br>MAIN |
| <i>Brachypodium distachyon</i> | Bd                                     |
| <i>Brassica rapa</i>           | Br                                     |
| <i>Boechera stricta</i>        | Bs                                     |
| <i>Carica papaya</i>           | Cp                                     |
| <i>Capsella rubella</i>        | Cr                                     |
| <i>Cucumis sativus</i>         | Cs                                     |
| <i>Citrus sinensis</i>         | Csi                                    |
| <i>Eucalyptus grandis</i>      | Eg                                     |
| <i>Eutrema salsugineum</i>     | Es                                     |
| <i>Fragaria vesca</i>          | Fv                                     |
| <i>Gossypium graimondii</i>    | Gg                                     |
| <i>Glycine max</i>             | Gm                                     |
| <i>Musa acuminata</i>          | Ma                                     |
| <i>Malus domestica</i>         | Md                                     |
| <i>Mimulus guttatus</i>        | Mg                                     |
| <i>Medicago truncatula</i>     | Mt                                     |
| <i>Oryza sativa</i>            | Os                                     |
| <i>Prunus persica</i>          | Pp                                     |
| <i>Populus trichocarpa</i>     | Pt                                     |
| <i>Panicum virgatum</i>        | Pv                                     |
| <i>Phaseolus vulgaris</i>      | Pvu                                    |
| <i>Ricinus communis</i>        | Rc                                     |
| <i>Sorghum bicolor</i>         | Sb                                     |
| <i>Solanum lycopersicum</i>    | Sl                                     |
| <i>Spirodela polyrhiza</i>     | Spo                                    |
| <i>Salix purpurea</i>          | Sp                                     |
| <i>Solanum tuberosum</i>       | St1                                    |
| <i>Theobroma cacao</i>         | Tc                                     |
| <i>Vitis vinefera</i>          | Vv                                     |
| <i>Zea mays</i>                | Zm                                     |

**Supplementary Table 2.** Next-generation sequencing reads statistics.

**BS-seq**

| Sample              | Total reads | Total mapping reads | Total mapping reads (%) | Uniquely mapping reads | Uniquely mapping reads (%) | Average coverage (x; per strand) | False Methylation Rate (%) |
|---------------------|-------------|---------------------|-------------------------|------------------------|----------------------------|----------------------------------|----------------------------|
| Col-0 rep1          | 25 328 898  | 24 611 823          | 97.2                    | 21 431 252             | 84.6                       | 11.3                             | 0.13                       |
| Col-0 rep2          | 20 276 366  | 19 734 703          | 97.3                    | 17 303 618             | 85.3                       | 9.6                              | 0.13                       |
| <i>mail1-1</i> rep1 | 28 011 986  | 27 040 056          | 96.5                    | 23 076 265             | 82.4                       | 11.5                             | 0.22                       |
| <i>mail1-1</i> rep2 | 22 826 548  | 21 978 645          | 96.3                    | 19 081 199             | 83.6                       | 10.2                             | 0.16                       |

**RNA-seq**

| Sample                          | Total reads | Mapped reads | Overall read mapping rate | Mapped reads with multiple alignments (<20) | Library name |
|---------------------------------|-------------|--------------|---------------------------|---------------------------------------------|--------------|
| WT rep1                         | 59 043 491  | 58 202 411   | 98.6%                     | 2 497 242                                   | GSL-24       |
| WT rep2                         | 34 426 256  | 31 808 694   | 92.4%                     | 1 428 654                                   | GSL-58       |
| <i>mail1-1</i> rep1             | 46 907 535  | 46 145 461   | 98.4%                     | 1 702 742                                   | GSL-25       |
| <i>mail1-1</i> rep2             | 37 576 029  | 36 181 773   | 96.3%                     | 1 332 694                                   | GSL-61       |
| <i>main</i> rep1                | 65 783 235  | 63 803 207   | 97.0%                     | 2 889 579                                   | GSL-56       |
| <i>main</i> rep2                | 41 120 396  | 39 926 528   | 97.1%                     | 1 395 110                                   | GSL-64       |
| <i>mail1-1 main</i> rep1        | 76 716 147  | 74 779 767   | 97.5%                     | 3 109 052                                   | GSL-57       |
| <i>mail1-1 main</i> rep2        | 37 362 685  | 36 291 866   | 97.1%                     | 1 285 087                                   | GSL-65       |
| <i>atxr5 atxr6</i> rep1         | 38 626 275  | 37 045 762   | 95.9%                     | 1 510 585                                   | GSL-59       |
| <i>atxr5 atxr6</i> rep2         | 41 290 652  | 39 550 236   | 95.8%                     | 1 628 767                                   | GSL-60       |
| <i>mail1-1 atxr5 atxr6</i> rep1 | 40 351 221  | 38 694 757   | 95.9%                     | 1 422 355                                   | GSL-62       |
| <i>mail1-1 atxr5 atxr6</i> rep2 | 40 150 203  | 38 890 711   | 96.9%                     | 1 406 539                                   | GSL-63       |

**small RNA-seq**

| Sample         | Total 18-26nt reads | 18-26nt mapped reads | 18-26nt read mapping rate | 21nt mapped reads | 24nt mapped reads | Library name |
|----------------|---------------------|----------------------|---------------------------|-------------------|-------------------|--------------|
| WT             | 15 140 341          | 12 987 685           | 85.8%                     | 2 251 105         | 7 463 475         | GSL-35       |
| <i>mail1-1</i> | 17 889 074          | 14 703 600           | 82.2%                     | 2 342 454         | 8 568 954         | GSL-40       |



## Supplementary References

1. Stroud H, Greenberg MV, Feng S, Bernatavichute YV, Jacobsen SE. Comprehensive analysis of silencing mutants reveals complex regulation of the Arabidopsis methylome. *Cell* **152**, 352-364 (2013).
